# Supplementary figures and images for: Comparison of Spectralis and Cirrus spectral domain optical coherence tomography for the objective morphometric assessment of the neuroretinal rim width
Source: Springer Nature journal article supplement (doi:10.1007/s00417-019-04299-x), 2019-03-29

Nasal Quadrant

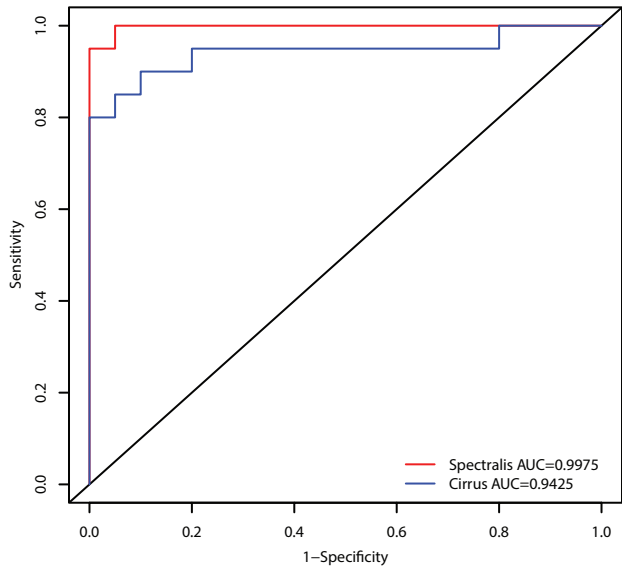

Superior Quadrant

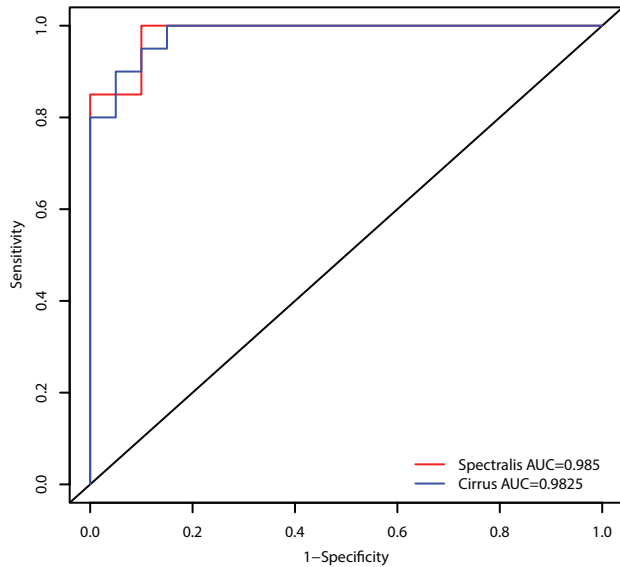

Temporal Quadrant

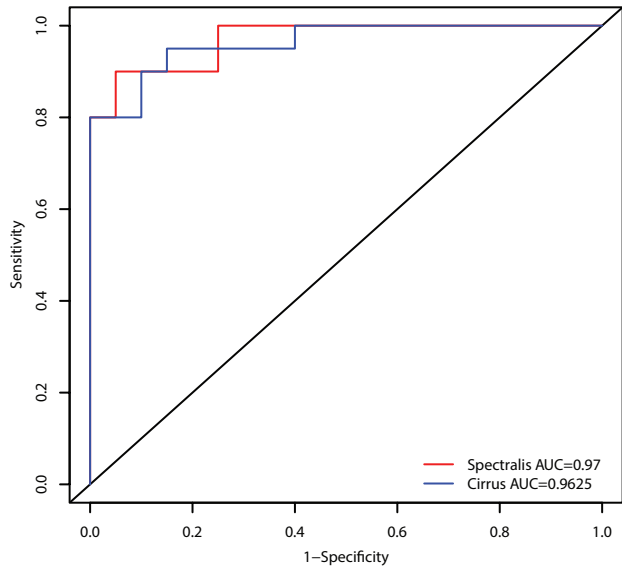

Inferior Quadrant

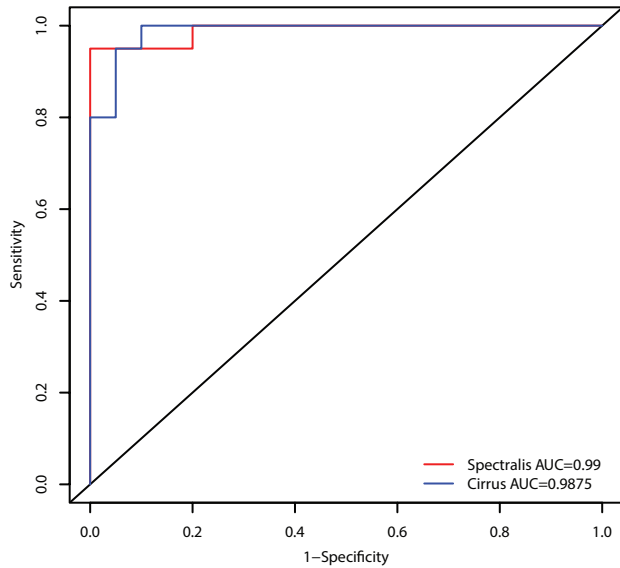

Supplement: MOESM1 [file 16584788]
